# Supplementary material for: Combination of long-term 13CO2 labeling and isotopolog profiling allows turnover analysis of photosynthetic pigments in Arabidopsis leaves
Source: Research Square preprint supplement (doi:10.21203/rs.3.rs-1405084/v1), 2022-05-18
Supplement: Supplementary file [file faaf7d2a58fa5d591097ee83.pdf]

## Additional file 1

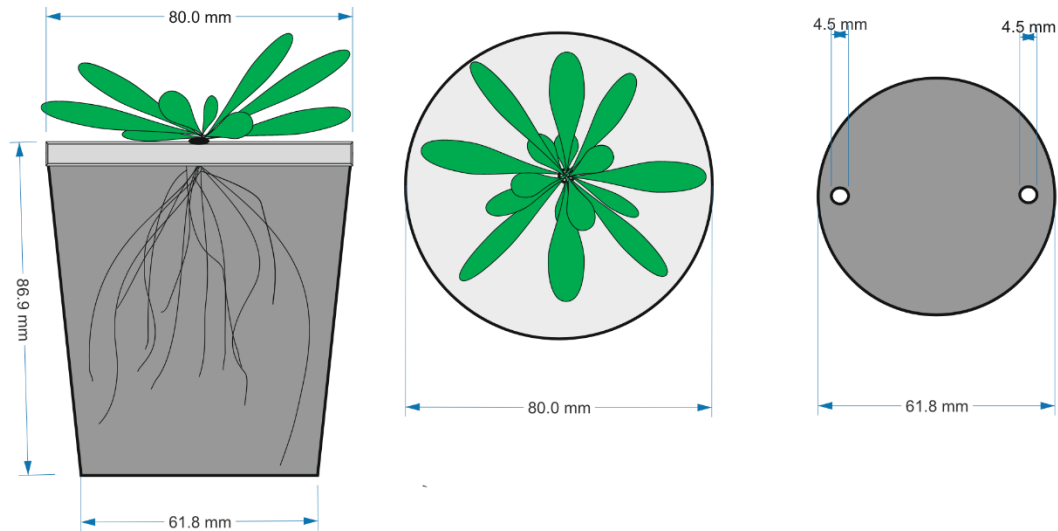

**Fig. A1.** Cultivation of Arabidopsis plants in plastic cups. Leaves can grow out of the cup (300 mL volume) through a hole (3 mm diameter) made in the center of the plastic lid. The lid separates the rosette from the root system growing in moist soil inside the cup, thus minimizing the impact of root and soil respiration on the CO<sub>2</sub> composition inside the labeling chamber. The lid is covered with aluminum foil to suppress growth of green algae on the soil surface. Two holes (4.5 mm diameter) are made in the bottom of the cup for bottom watering.

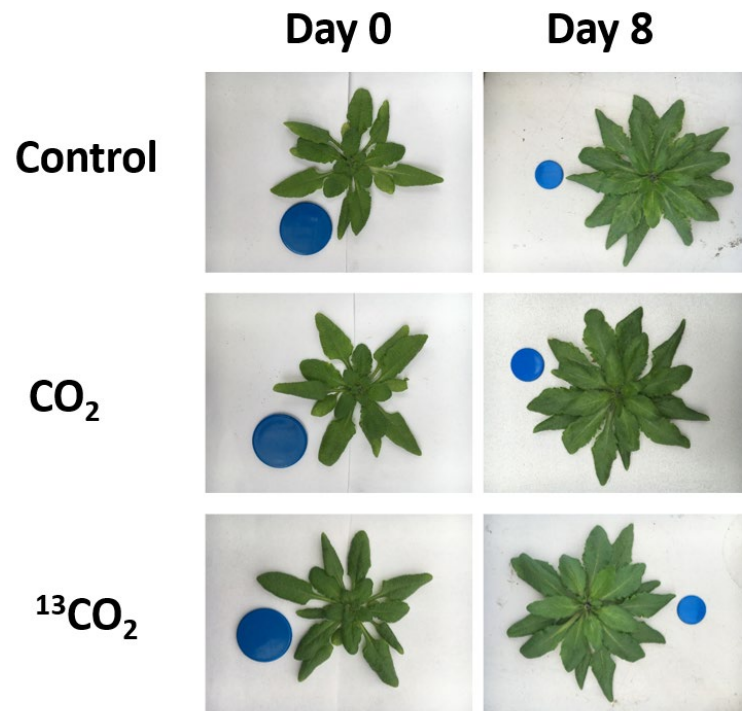

**Fig. A2.** Rosette leaves of *Arabidopsis* plants before (day 0) and after 7-d exposure to the different airs (day 8). All plants were grown in the same conditions prior to the experiment. Control: Plants stayed in the ambient air outside the labeling chamber. CO<sub>2</sub> and <sup>13</sup>CO<sub>2</sub>: Plants were exposed to CO<sub>2</sub> or <sup>13</sup>CO<sub>2</sub> in the labeling chamber. Blue reference chips next to the plants have a diameter of 2 cm.

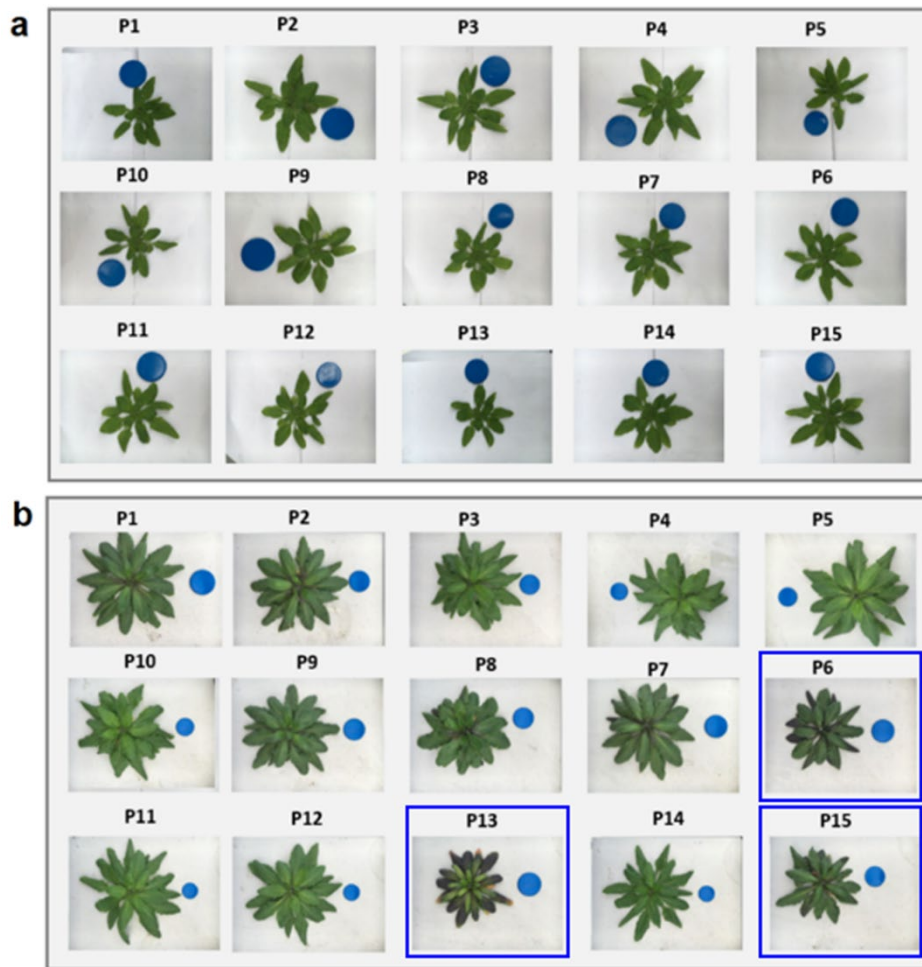

**Fig. A3.** 15 *Arabidopsis* plants before and after 7-d exposure to  $^{13}\text{CO}_2$  in the labeling chamber. **a** 15 plants of similar size (PLA 14–16 cm<sup>2</sup>) were selected and placed in the labeling chamber at the end of the light period of day 0 (the day before starting  $^{13}\text{CO}_2$  treatment). **b** The same 15 plants after 7-d  $^{13}\text{CO}_2$  exposure, in the early morning of day 8. The plants in blue frames had less  $^{13}\text{C}$  incorporation in pigments. The conditions inside the labeling chamber are shown in Additional file 1; Figs. A5–A7. Blue reference chips in the images have a diameter of 2 cm. The rosettes were harvested and shock-frozen in liquid N<sub>2</sub> immediately after taking the images in **b**.

**a**

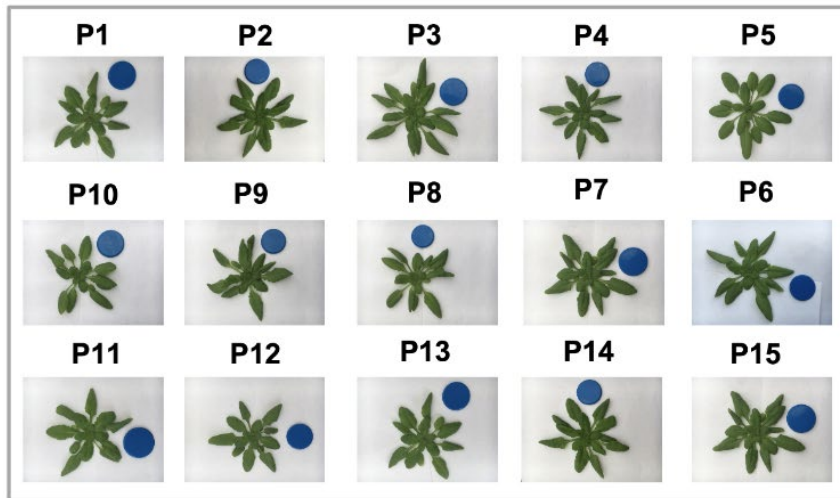

**b**

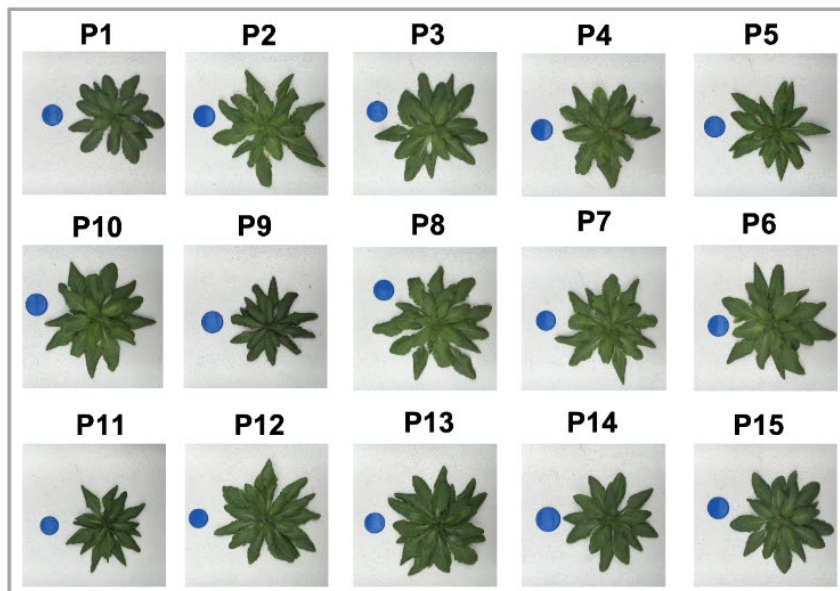

**Fig. A4.** 15 *Arabidopsis* plants before and after 7-d exposure to normal CO<sub>2</sub> in the labeling chamber. **a** 15 plants of similar size (PLA 14–16 cm<sup>2</sup>) were selected and placed in the labeling chamber at the end of the light period of day 0. **b** The same 15 plants in the early morning of day 8. Blue reference chips in the images have a diameter of 2 cm.

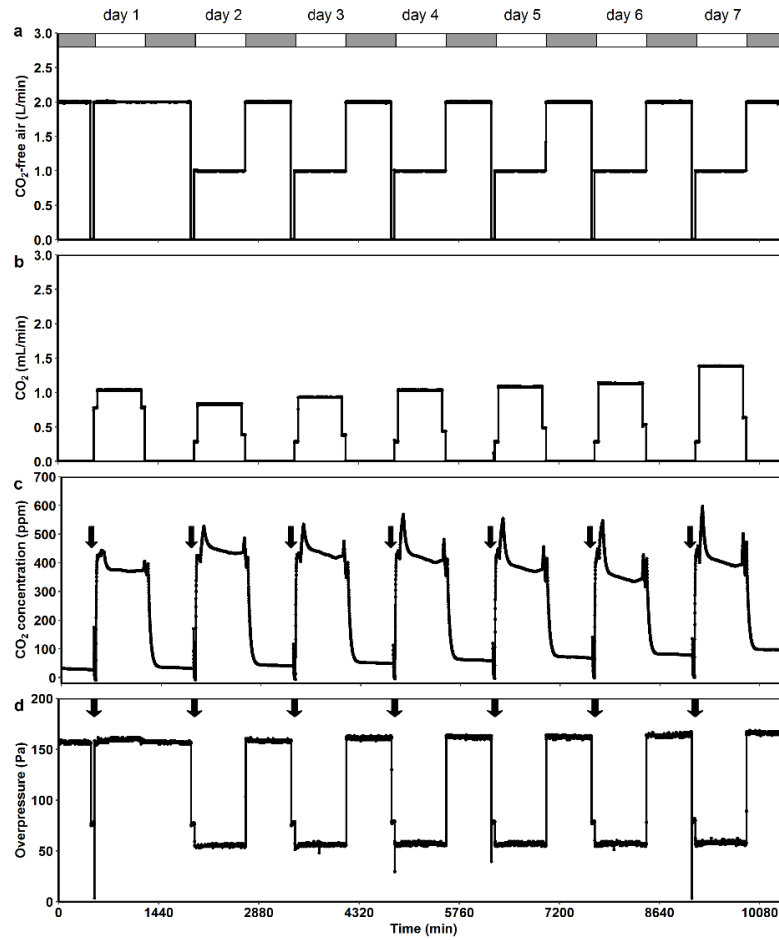

**Fig. A5.** Flow rates of CO<sub>2</sub>-free air and CO<sub>2</sub> as well as real-time readings of the CO<sub>2</sub> concentration and overpressure inside the labeling chamber. **a** During the light period the flow rate of CO<sub>2</sub>-free air (controlled by MFC3; see Fig. 1 for gas flow assembly) was set to 2 L min<sup>-1</sup> on the 1st day of labeling (day 1) followed by a reduction to 1 L min<sup>-1</sup> starting from day 2. The flow rate during the dark period was kept at 2 L min<sup>-1</sup>. At the end of each dark period the labeling chamber was flushed with CO<sub>2</sub>-free air (10 L min<sup>-1</sup> for 45 min by MFC1) to replace the air containing CO<sub>2</sub> that partly came from dark respiration (indicated by arrows in **c** and **d**). This was followed by 20-min equilibration with a fresh mixture of CO<sub>2</sub>-free air (10 L min<sup>-1</sup> by MFC1) and CO<sub>2</sub> (5 mL min<sup>-1</sup> by MFC4) before LED lamps were turned on (not shown). An outlet valve was automatically opened during flushing and equilibration. White and grey bars at the top show light and dark periods, respectively. **b** CO<sub>2</sub> was continuously injected into the chamber by MFC2 during the light period. Except on day 1 when a slightly higher CO<sub>2</sub> flow rate was applied to match the higher daytime flow rate of CO<sub>2</sub>-free air, the initial CO<sub>2</sub> flow rate under morning dim light (~28 μmol photon m<sup>-2</sup> s<sup>-1</sup>; see Additional file 1; Fig. A7a for light intensity regime) was set to 0.3 mL min<sup>-1</sup>. As with the increase in light intensity, the CO<sub>2</sub> flow rate was raised to 0.75 mL min<sup>-1</sup> on day 2 and up to 1.5 mL min<sup>-1</sup> on day 7; the flow rate had to be increased from day to day as the 15 *Arabidopsis* plants grew larger. When the light intensity decreased at the end of the light period, the CO<sub>2</sub> flow rate was also reduced to reach zero at the onset of the dark period. **c** The [CO<sub>2</sub>] inside the labeling chamber was continuously monitored by LI-840. The daytime [CO<sub>2</sub>] stayed at ~400 ppm except for a brief overshoot in the morning, while the nighttime [CO<sub>2</sub>] (i.e., when the chamber was running with CO<sub>2</sub>-free air) gradually increased from ~30 to ~100 ppm over the seven days. The daily flushing (black arrows) effectively reset [CO<sub>2</sub>] to almost zero at the end of each dark period. **d** The labeling chamber was run under small overpressure to prevent diffusion of external ambient air into the labeling chamber and to minimize the impact of root and soil respiration on the gas inside the labeling chamber. The overpressure, which was created by the flow of CO<sub>2</sub>-free air, was switching between ~60 Pa (when MFC3 was running at 1 L min<sup>-1</sup>) and 160–170 Pa (when it was running at 2 L min<sup>-1</sup>). The overpressure was ~80 Pa during the flushing and equilibration (black arrows).

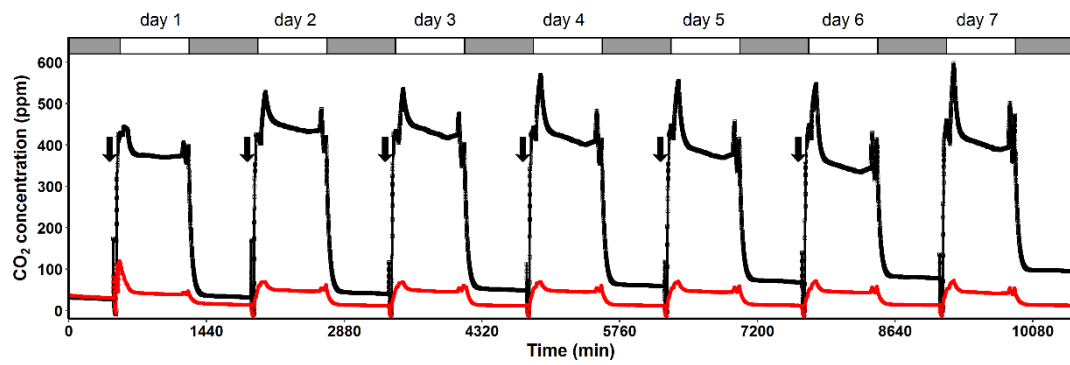

**Fig. A6.** CO<sub>2</sub> concentration measured by LI-840. The labeling chamber was running with normal CO<sub>2</sub> (black line) or <sup>13</sup>CO<sub>2</sub> (red line). Note that LI-840 has a very low sensitivity to <sup>13</sup>CO<sub>2</sub> and thus shows very low values in <sup>13</sup>CO<sub>2</sub>. Nevertheless, the flow rate program (see Additional file 1; Fig. A5a, b) produced highly reproducible light/dark patterns of [CO<sub>2</sub>] in both CO<sub>2</sub> and <sup>13</sup>CO<sub>2</sub> conditions. Black arrows show flushing and equilibration events at the end of each dark period. White and grey bars at the top are for light and dark periods, respectively.

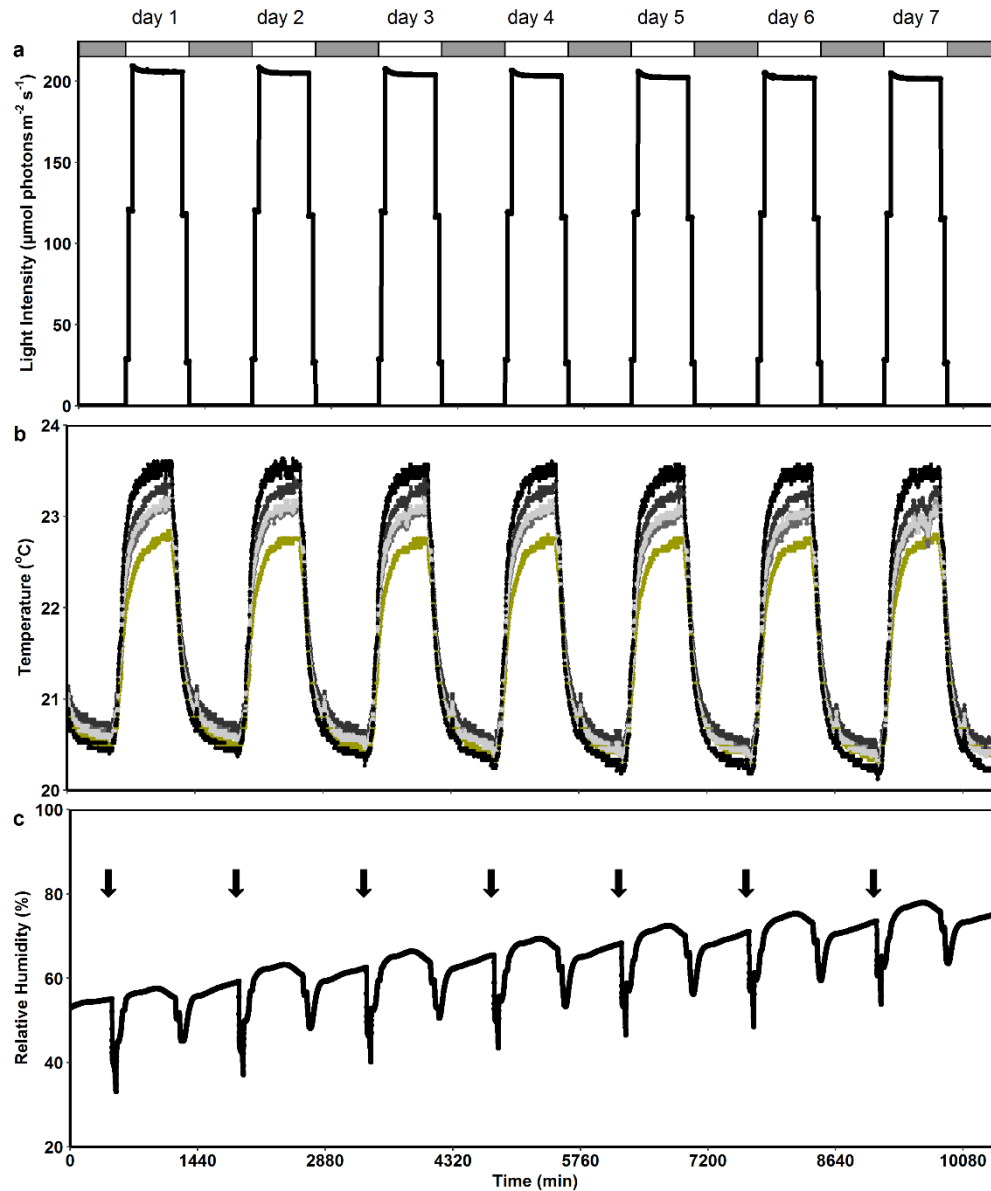

**Fig. A7.** Conditions inside the  $^{13}\text{CO}_2$  labeling chamber. **a** The light intensity was measured at the center of the closed labeling chamber (see Fig. 1 for sensor positions). The intensity of the LED lamps was increased or decreased stepwise at the beginning or at the end of the light period, respectively. The white and grey bars at the top show 12 h/12 h light/dark regime. **b** The temperature was measured by five temperature sensors as well as a temperature probe of the humidity sensor mounted at different positions of the labeling chamber. While the nighttime temperature was around 20.5  $^{\circ}\text{C}$  in all positions, the daytime values under the LED lamps varied between 22.5 and 23.5  $^{\circ}\text{C}$ . Note that the temperature sensors (except the temperature probe of the humidity sensor; green line) were directly exposed to the light, which may explain their higher readings. **c** The relative air humidity in the closed labeling chamber gradually increased from ~55% to ~75% over seven day/night cycles as the plants grew larger and transpired more. The black arrows show flushing and equilibration events.

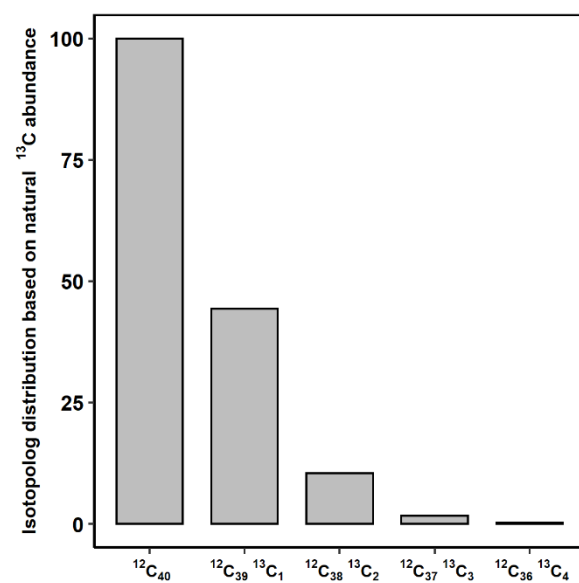

**Fig. A8.** Simulation of carotenoid isotopolog distribution based on the natural  $^{13}\text{C}$  abundance.

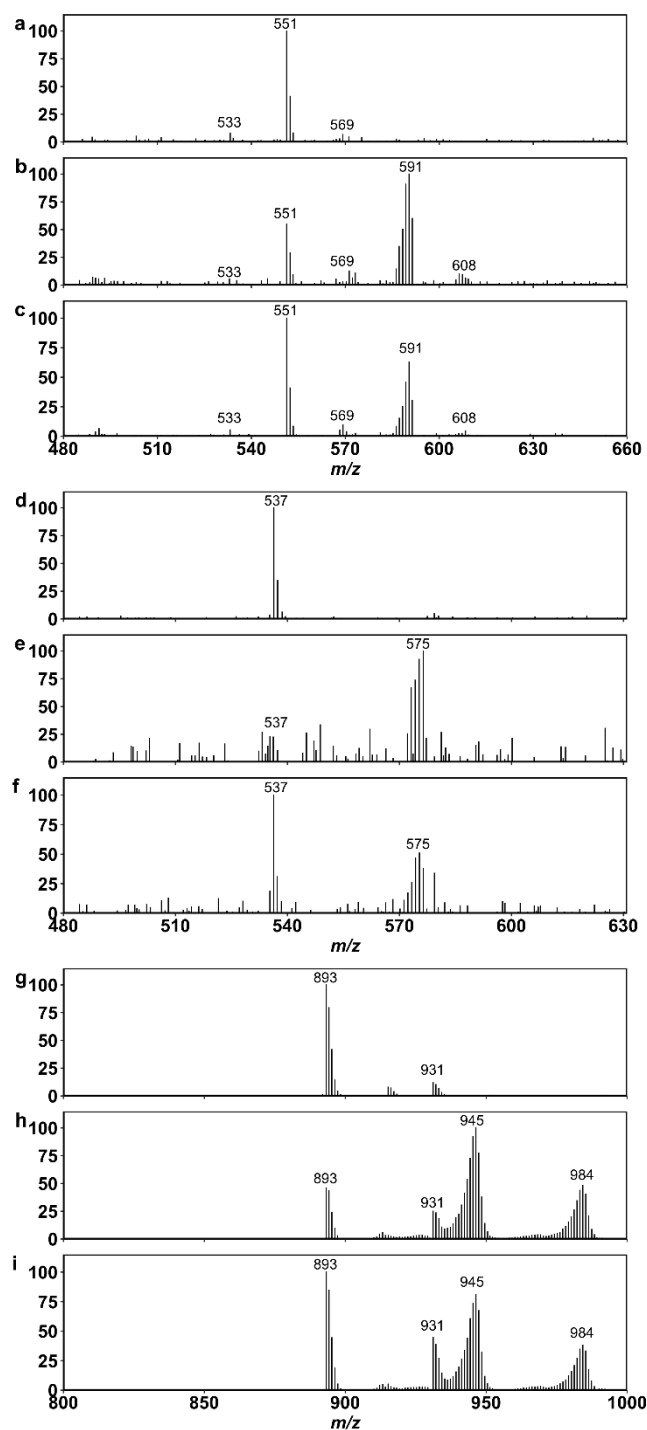

**Fig. A9.** Mass spectra of Lut (**a–c**), all-*trans*- $\beta$ -Car (**d–f**) and Chl *a* (**g–i**) from the spike tests of TQ-MS. **a**, **d** and **g** Non-labeled Lut,  $\beta$ -Car and Chl *a* standard diluted in acetone. **b**, **e** and **h** Lut,  $\beta$ -Car and Chl *a* of a  $^{13}\text{C}$ -labeled Arabidopsis leaf pigment extract. **c**, **f** and **i** Non-labeled Lut,  $\beta$ -Car and Chl *a* standard (shown in **a**, **d** and **g**) added to the  $^{13}\text{C}$ -labeled Arabidopsis leaf pigment extract (shown in **b**, **e** and **h**). The pigment recovery is summarized in Additional file 2; Table A1.

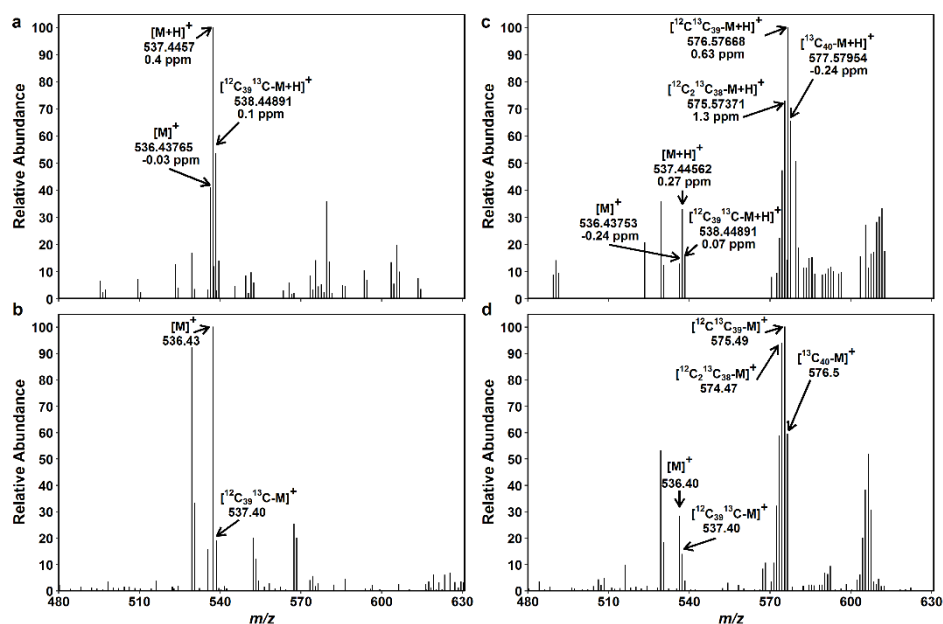

**Fig. A10.** Mass spectra of 9-*cis*-β-Car extracted from non-labeled and <sup>13</sup>C-labeled *Arabidopsis* plants. FTICR-MS showing  $[M]^+$  and  $[M+H]^+$  ions of a non-labeled (a) and a <sup>13</sup>C-labeled (c) sample. Deviations from the expected mass ( $\Delta$ ) are given in parts per million (ppm). TQ-MS showing predominantly  $[M]^+$  ion in the same non-labeled (b) and <sup>13</sup>C-labeled (d) samples as in a and c. Overlapping mass peaks of  $[M]^+$  and  $[M+H]^+$  ions are regarded as  $[M+H]^+$  or  $[M]^+$  in the analysis of FTICR-MS and TQ-MS, respectively. Peak assignment is according to Additional file 2; Tables A3–A6.

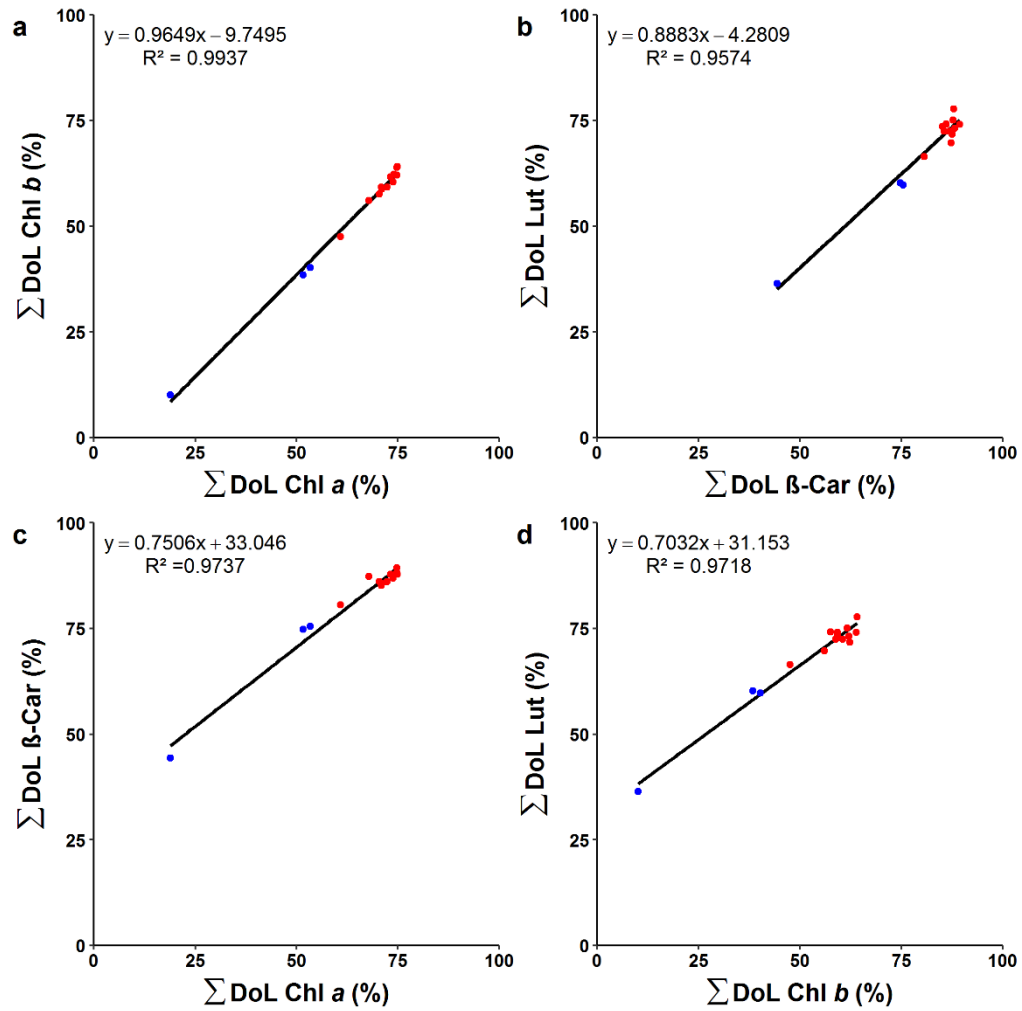

**Fig. A11.** Correlation between the degree of  $^{13}\text{C}$  labeling ( $\Sigma\text{DoL}$ ) of different pigments extracted from Arabidopsis leaves after 7-d  $^{13}\text{CO}_2$  labeling. **a** Chl *a* and Chl *b*. **b** All-*trans*- $\beta$ -Car and Lut. **c** Chl *a* and all-*trans*- $\beta$ -Car. **d** Chl *b* and Lut. Red and blue symbols represent plants that had higher ( $n=12$ ) or lower ( $n=3$ )  $^{13}\text{C}$  incorporation in pigments, respectively.
